# Supplementary material
Source: PubMed Central journal article supplement (PMC2885208)

## FIGURE LEGENDS

Supplemental Fig. 1. rNHERF-1 co-precipitated with Flag-rMrp2 in co-transfected HEK293 cells. Cell lysates were incubated with anti-Flag M2 agarose beads and the Co-IP complex was immunoblotted with anti-NHERF-1 antibody AB5487. Note that NHERF-1 was detected only in the Co-IP complex from cells co-transfected with plasmids expressing both Flag-rMrp2 and rNHERF-1 but not from cells transfected with rNHERF-1 or Flag-Mrp2 alone or vector control. IB, immunoblotting; IP, immunoprecipitation.

Supplemental Figure 1

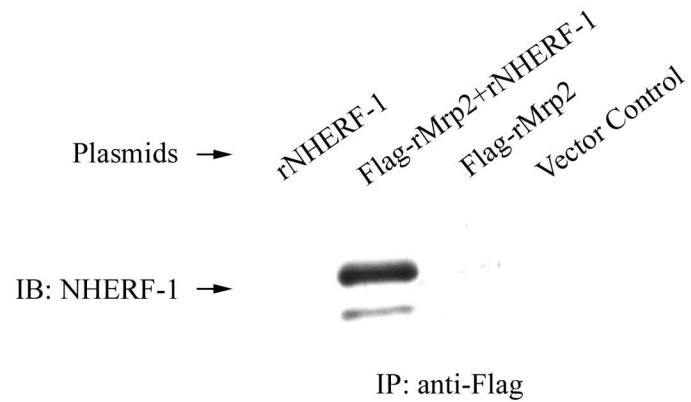

Supplement: supp_M109.096081_jbc.M109.096081-1.pdf [file supp_M109.096081_jbc.M109.096081-1.pdf]
